# Supplementary material for: Mate Preference of Female Blue Tits Varies with Experimental Photoperiod
Source: PubMed Central journal article supplement (PMC3966787; doi:10.1371/journal.pone.0092527), 2014-03-26
Supplement: pone.0092527.s002.pdf [file pone.0092527.s002.pdf]

**Table S1.** Sample sizes used in the mate-choice experiment in Corsican blue tits, indicating number of females tested within origin population, and photoperiodic treatments under which testing occurred

| <b>Photoperiodic treatment</b> | <b>Muro Females</b> | <b>Pirio Females</b> | <b>Totals</b> |
|--------------------------------|---------------------|----------------------|---------------|
| 9L:15D                         | 6                   | 6                    | 12            |
| 14L:10D                        | 4                   | 7                    | 11            |
| 18L:6D                         | 5                   | 6                    | 11            |
| <b>Totals</b>                  | <b>15</b>           | <b>19</b>            | <b>34</b>     |
