# Supplementary material for: Mate Preference of Female Blue Tits Varies with Experimental Photoperiod
Source: PubMed Central journal article supplement (PMC3966787; doi:10.1371/journal.pone.0092527), 2014-03-26
Supplement: pone.0092527.s005.pdf [file pone.0092527.s005.pdf]

**Table S4.** Effects of photoperiod and population of origin on female interest for males (= proportion of time spent with any male) in Corsican blue tits (n=34). The minimal adequate model is the null model, variables are presented in the reverse order in which they were removed from the model.

| <b>Variable</b>    | <b>Estimate</b> | <b>df</b> | <b>t</b> | <b>P</b> |
|--------------------|-----------------|-----------|----------|----------|
| Photoperiod        | 0.016           | 1         | 1.323    | 0.180    |
| Origin             | 0.135           | 1         | 1.429    | 0.143    |
| Time of day        | -0.001          | 1         | -0.019   | 0.850    |
| Photoperiod*Origin | 0.017           | 1         | 0.689    | 0.433    |
