# Supplementary material for: Mate Preference of Female Blue Tits Varies with Experimental Photoperiod
Source: PubMed Central journal article supplement (PMC3966787; doi:10.1371/journal.pone.0092527), 2014-03-26
Supplement: pone.0092527.s006.pdf [file pone.0092527.s006.pdf]

**Table S5.** Effects of photoperiod and population of origin on female preference strength (= proportion of time spent with the male chosen) in Corsican blue tits (n=34). Photoperiod is the only variable in the minimal adequate model, eliminated variables are presented in the reverse order in which they were removed from the model.

| <b>Variable</b>    | <b>Estimate</b> | <b>df</b> | <b>t</b>     | <b>P</b>      |
|--------------------|-----------------|-----------|--------------|---------------|
| <b>Photoperiod</b> | <b>0.016</b>    | <b>1</b>  | <b>2.254</b> | <b>0.018*</b> |
| Origin             | 0.070           | 1         | 1.296        | 0.155         |
| Time of day        | -0.001          | 1         | -0.378       | 0.669         |
| Photoperiod*Origin | 0.009           | 1         | 0.659        | 0.449         |
