# Supplementary material for: Mate Preference of Female Blue Tits Varies with Experimental Photoperiod
Source: PubMed Central journal article supplement (PMC3966787; doi:10.1371/journal.pone.0092527), 2014-03-26
Supplement: pone.0092527.s007.pdf [file pone.0092527.s007.pdf]

**Table S6.** Effects of photoperiod, morphological and behavioural traits of males and females on female preference strength (= proportion of time spent with the male chosen) in Corsican blue tits (n=34). Variables in bold represent the minimal adequate models, eliminated variable are presented in the reverse order in which they were removed from the model.

| Trait analyzed       | Variable                                                               | Estimate      | df       | t             | P             |
|----------------------|------------------------------------------------------------------------|---------------|----------|---------------|---------------|
| <i>Tarsus length</i> |                                                                        |               |          |               |               |
|                      | <b>Photoperiod</b>                                                     | <b>0.017</b>  | <b>1</b> | <b>2.495</b>  | <b>0.008*</b> |
|                      | <b>Chosen male tarsus</b>                                              | <b>0.162</b>  | <b>1</b> | <b>2.376</b>  | <b>0.012*</b> |
|                      | Female tarsus                                                          | -0.057        | 1        | -0.840        | 0.344         |
|                      | Non-chosen male tarsus                                                 | 0.018         | 1        | 0.236         | 0.786         |
|                      | Chosen male tarsus*Non-chosen male tarsus                              | -0.285        | 1        | -1.223        | 0.158         |
|                      | Photoperiod*Chosen male tarsus                                         | 0.015         | 1        | 0.767         | 0.363         |
|                      | Photoperiod*Non-chosen male tarsus                                     | -0.013        | 1        | -0.630        | 0.445         |
|                      | Photoperiod*Chosen male tarsus*Non-chosen male tarsus                  | -0.093        | 1        | -1.378        | 0.094         |
|                      | Female tarsus*Chosen male tarsus*Non-chosen male tarsus                | -0.013        | 1        | -0.891        | 0.263         |
| <i>Wing length</i>   |                                                                        |               |          |               |               |
|                      | <b>Photoperiod</b>                                                     | <b>0.013</b>  | <b>1</b> | <b>1.965</b>  | <b>0.025*</b> |
|                      | <b>Female wing</b>                                                     | <b>0.029</b>  | <b>1</b> | <b>1.737</b>  | <b>0.048*</b> |
|                      | <b>Chosen male wing</b>                                                | <b>0.034</b>  | <b>1</b> | <b>1.558</b>  | <b>0.079</b>  |
|                      | <b>Non-chosen male wing</b>                                            | <b>-0.044</b> | <b>1</b> | <b>-1.859</b> | <b>0.035*</b> |
|                      | <b>Photoperiod*Chosen male wing</b>                                    | <b>0.011</b>  | <b>1</b> | <b>2.162</b>  | <b>0.015*</b> |
|                      | Chosen male wing*Non-chosen male wing                                  | -0.006        | 1        | -0.207        | 0.804         |
|                      | Photoperiod*Non-chosen male wing                                       | -0.001        | 1        | -0.054        | 0.948         |
|                      | Female wing*Chosen male wing*Non-chosen male wing                      | -0.001        | 1        | -0.626        | 0.439         |
|                      | Photoperiod*Chosen male wing*Non-chosen male wing                      | 0.003         | 1        | 0.539         | 0.496         |
| <i>Personality</i>   |                                                                        |               |          |               |               |
|                      | <b>Photoperiod</b>                                                     | <b>0.016</b>  | <b>1</b> | <b>2.254</b>  | <b>0.018*</b> |
|                      | Female personality                                                     | -0.001        | 1        | -0.556        | 0.537         |
|                      | Chosen male personality                                                | -0.001        | 1        | -0.159        | 0.857         |
|                      | Non-chosen male personality                                            | -0.001        | 1        | -0.560        | 0.520         |
|                      | Photoperiod*Chosen male personality                                    | 0.001         | 1        | 1.385         | 0.111         |
|                      | Chosen male personality*Non-chosen male personality                    | 0.001         | 1        | 0.145         | 0.770         |
|                      | Photoperiod*Non-chosen male personality                                | -0.001        | 1        | -0.345        | 0.675         |
|                      | Female personality*Chosen male personality*Non-chosen male personality | 0.001         | 1        | 1.871         | 0.080         |
|                      | Photoperiod*Chosen male personality*Non-chosen male personality        | 0.001         | 1        | 0.473         | 0.515         |
